# Supplementary material for: Transbronchial biopsy results according to diffuse interstitial lung disease classification. Cryobiopsy versus forceps: MULTICRIO study
Source: PLoS One. 2020 Sep 21;15(9):e0239114. doi: 10.1371/journal.pone.0239114 (PMC7505587; doi:10.1371/journal.pone.0239114)
Supplement: S1 File — (XLSX) [file pone.0239114.s002.xlsx]

## Sheet: CRIOBIOPSIA_DERIVADO
id	hospi	abord_vaerea	evaluable	motivo_no_evaluable	user	sexo	edad	fecha_cumplimenta	fecha_nacimiento	edad_calc	nhistoria	consentimiento	i1	i2	i3	e1	e2	e3	e4	e5	e6	e7	e8	e9	e10	exc	FEV1_P	FEV1	FVC_P	FVC	FEV1_FVC	dlco_p	kco_p	tac_distribucion	tac_patron	tac_otros	peso	talla	imc_calc	tlc_p	rv_p	fio2	po2	hco3	ph	pco2	sato2	t_cefalina	plaquetas
27	5. Hospital de Cruces. BILBAO	INTUBACIÓN OROTRAQUEAL	1		txomin	M	75	2016-03-14	2016-04-29		386359	si	si	si	si	no	no	no	no	no	no	no	no	no	no	no	106	179	105	218	82	43	68	Difusa asimétrica + periférica	Reticular	Bronquiectasias				73	50							33	108
29	5. Hospital de Cruces. BILBAO	INTUBACIÓN OROTRAQUEAL	1		txomin	V	52	2016-04-04	1963-10-12	52.4787	2837	si	si	si	si	no	no	no	no	no	no	no	no	no	no	no	75	249	79	325	77	79	113	Periférica	Panal + retículo	Bronquiectasias	90	1.7	31.1419	72.6	65.5							31	274
30	5. Hospital de Cruces. BILBAO	INTUBACIÓN OROTRAQUEAL	1		txomin	V	70	2016-04-11	1946-04-23	69.9691	149400	si	si	si	si	no	no	no	no	no	no	no	no	no	no	no	81	252	71	289	79	31	57.5	Periférica	Vidrio deslustrado + retículo	Bronquiectasias	88	1.77	28.089	62.7	51.7							30	150
32	5. Hospital de Cruces. BILBAO	INTUBACIÓN OROTRAQUEAL	1		txomin	M	55	2016-05-09	1960-11-19	55.4699	59308	si	si	si	si	no	no	no	no	no	no	no	no	no	no	no	128	301	123	341	88	72	68	Difusa asimétrica + periférica	Vidrio deslustrado + retículo		52	1.6	20.3125	113	102							29	271
33	5. Hospital de Cruces. BILBAO	INTUBACIÓN OROTRAQUEAL	1		txomin	M	58	2016-06-06	1958-07-12	57.9029	93455	si	si	si	si	no	no	no	no	no	no	no	no	no	no	no	121	355	137	264	74	71	65.7	Difusa simétrica			61	1.57	24.7475	121	128							30	263
35	2. Hospital Germans Trias i Pujol. BADALONA	INTUBACIÓN OROTRAQUEAL	1		prueba	V	67	2016-09-30	2016-09-30		8130382	si	si	si	si	no	no	no	no	no	no	no	no	no	no	no	112	3230	98	3650	88	85	97	Difusa simétrica	Condensación + vidrio deslustrado	Adenopatías calcificadas	79	1.65	29.0174								98	32.1	219
36	6. Hospital de la Santa Creu i Sant Pau	INTUBACIÓN OROTRAQUEAL	1		vpajares	V	50	2016-10-25	1966-04-05	50.5567	1648710	si	si	si	si	no	no	no	no	no	no	no	no	no	no	no	72	289	80	414	69	70	94	Difusa asimétrica + periférica	Vidrio deslustrado + retículo		95	1.76	30.6689	80	68	21	86	25	7.4	40	97.1	0.94	214
37	6. Hospital de la Santa Creu i Sant Pau	INTUBACIÓN OROTRAQUEAL	1		vpajares	M		2016-10-25	1946-07-30	70.2389	1549569	si	si	si	si	no	no	no	no	no	no	no	no	no	no	no	72	138	64	170	81	42	72	Difusa asimétrica	Vidrio deslustrado + retículo	Bronquiectasias	68	1.54	28.6726	75	81	21					95	0.93	171
39	5. Hospital de Cruces. BILBAO	INTUBACIÓN OROTRAQUEAL	1		txomin	V	57	2016-06-20	1959-07-20	56.9193	201704	si	si	si	si	no	no	no	no	no	no	no	no	no	no	no	107	402	101	180	84	73	88	Difusa asimétrica	Vidrio deslustrado	Bronquiectasias	94	1.83	28.0689	85	102							32	138
45	1. Hospital G.U. Santa Lucía. CARTAGENA	INTUBACIÓN OROTRAQUEAL	1		jvperpal	M	56	2016-10-30	1960-01-09	56.806	271154	si	si	si	si	no	no	no	no	no	no	no	no	no	no	no	98	2320	98	2730	85	63	83	Localizada	Vidrio deslustrado		94	1.6	36.7188			21	58	25	7.45	37	89		28300
47	1. Hospital G.U. Santa Lucía. CARTAGENA	INTUBACIÓN OROTRAQUEAL	1		jvperpal	M	48	2016-10-31	2016-10-31		146204	si	si	si	si	no	no	no	no	no	no	no	no	no	no	no	65	1670	64	1950	86	36	71	Difusa simétrica	Panal + retículo		69	1.61	26.6193	88	141	21	72	24	7.38	39	95	1.1	229
48	1. Hospital G.U. Santa Lucía. CARTAGENA	INTUBACIÓN OROTRAQUEAL	1		jvperpal	V	59	2016-10-31	2016-10-31		473055	si	si	si	si	no	no	no	no	no	no	no	no	no	no	no	99	3210	98	4040	79	54	74	Difusa asimétrica	Panal + retículo	Bronquiectasias	84	1.73	28.0664	101	118	21	83	23	7.42	35	96	0.9	182
49	1. Hospital G.U. Santa Lucía. CARTAGENA	INTUBACIÓN OROTRAQUEAL	1		jvperpal	M	64	2016-10-31			2510	si	si	si	si	no	no	no	no	no	no	no	no	no	no	no	131	2750	128	3200	86			Difusa asimétrica	Condensación + vidrio deslustrado	Bronquiectasias	80	1.6	31.25			21	87	24	7.39	36	98	1.1	200
50	1. Hospital G.U. Santa Lucía. CARTAGENA	INTUBACIÓN OROTRAQUEAL	1		jvperpal	M	49	2016-10-31	1967-07-04	49.3265	107208	si	si	si	si	no	no	no	no	no	no	no	no	no	no	no								Difusa asimétrica	Condensación/alveolar		65	1.63	24.4646			21	81	23	7.36	37	96	1.4	175
51	1. Hospital G.U. Santa Lucía. CARTAGENA	INTUBACIÓN OROTRAQUEAL	1		jvperpal	V	64	2016-11-01	1951-12-06	64.9046	428638	si	si	si	si	no	no	no	no	no	no	no	no	no	no	no	51	1810	48	2290	79	44	54	Difusa asimétrica	Vidrio deslustrado + retículo	Granuloma	101	1.71	34.5405	48		21	63	23	7.41	34	90	1.4	188
52	1. Hospital G.U. Santa Lucía. CARTAGENA	INTUBACIÓN OROTRAQUEAL	1		jvperpal	M	75	2016-11-01	1941-07-25	75.2717	27750	si	si	si	si	no	no	no	no	no	no	no	no	no	no	no	65	1140	58	1240	92			Difusa asimétrica + periférica	Vidrio deslustrado + retículo	Bronquiectasias	85	1.56	34.9277	46	46	21	71	26	7.47	35	94	0.7	257
53	1. Hospital G.U. Santa Lucía. CARTAGENA	INTUBACIÓN OROTRAQUEAL	1		jvperpal	M	34	2016-11-01	1980-03-28	36.5956	204351	si	si	si	si	no	no	no	no	no	no	no	no	no	no	no	81	2440	81	2810	86	43	56	Difusa asimétrica	Condensación + vidrio deslustrado		71	1.62	27.0538	74	85	21	85	24	7.38	37	97	0.7	325
54	1. Hospital G.U. Santa Lucía. CARTAGENA	INTUBACIÓN OROTRAQUEAL	1		jvperpal	M	54	2016-11-01	2016-11-01		35641	si	si	si	si	no	no	no	no	no	no	no	no	no	no	no	90	2040	87	2320	88	78	97	Difusa simétrica	Condensación/alveolar	Adenopatías calcificadas	69	1.57	27.993	85	94	21	97	23	7.38	35	99	1.1	304
55	1. Hospital G.U. Santa Lucía. CARTAGENA	INTUBACIÓN OROTRAQUEAL	1		jvperpal	M	62	2016-11-01	1954-08-27	62.1813	698930	si	si	si	si	no	no	no	no	no	no	no	no	no	no	no	77	1420	80	1780	77	50	79	Difusa simétrica	Panal + retículo	Bronquiectasias	69	1.51	30.2618	75	75	21	86	25	7.37	42	97	1	207
56	1. Hospital G.U. Santa Lucía. CARTAGENA	INTUBACIÓN OROTRAQUEAL	1		jvperpal	V	59	2016-11-01	1957-08-04	59.2443	274832	si	si	si	si	no	no	no	no	no	no	no	no	no	no	no	74	2430	68	2810	86	27	58	Periférica	Panal + retículo		77.5	1.73	25.8946	47	17	21	77	25	7.41	39	96	1.1	478
57	1. Hospital G.U. Santa Lucía. CARTAGENA	INTUBACIÓN OROTRAQUEAL	1		jvperpal	M	56	2016-11-02	1960-11-02	56	96929	si	si	si	si	no	no	no	no	no	no	no	no	no	no	no	75	1890	86	2550	74	92	120	Difusa asimétrica	Vidrio deslustrado		91	1.64	33.834	100	137	21	73	28	7.4	45	94	0.9	300
58	1. Hospital G.U. Santa Lucía. CARTAGENA	INTUBACIÓN OROTRAQUEAL	1		jvperpal	V	63	2016-11-02	1952-12-24	63.8579	45752	si	si	si	si	no	no	no	no	no	no	no	no	no	no	no	96	3230	85	2680	87	51	94	Difusa asimétrica	Reticular	Bronquiectasias	123	1.78	38.8209			21	85	25	7.36	37	96	1.1	304
59	1. Hospital G.U. Santa Lucía. CARTAGENA	INTUBACIÓN OROTRAQUEAL	1		jvperpal	V	64	2016-11-02	1952-03-21	64.6175	522686	si	si	si	si	no	no	no	no	no	no	no	no	no	no	no								Difusa asimétrica	Vidrio deslustrado		116	1.66	42.0961			21	82	27	7.4	38	95	0.7	167
60	1. Hospital G.U. Santa Lucía. CARTAGENA	INTUBACIÓN OROTRAQUEAL	1		jvperpal	V	69	2016-11-02	1947-02-15	69.7128	710636	si	si	si	si	no	no	no	no	no	no	no	no	no	no	no								Difusa asimétrica + periférica	Panal + retículo	Bronquiectasias	91	1.72	30.7599			21	78	26	7.43	41	97	0.9	321
61	1. Hospital G.U. Santa Lucía. CARTAGENA	INTUBACIÓN OROTRAQUEAL	1		jvperpal	V	49	2016-11-02	1967-02-11	49.7237	284319	si	si	si	si	no	no	no	no	no	no	no	no	no	no	no	72	2510	68	2880	87	77	102	Difusa simétrica	Reticular		88	1.71	30.0947	81	60	21	77	26	7.38	36	93	0.9	245
62	1. Hospital G.U. Santa Lucía. CARTAGENA	INTUBACIÓN OROTRAQUEAL	1		jvperpal	M	63	2016-11-02	1953-10-15	63.0498	715319	si	si	si	si	no	no	no	no	no	no	no	no	no	no	no	68	1390	68	1650	84	51	73	Difusa asimétrica	Vidrio deslustrado + retículo		60	1.55	24.974	85	118	21	79	41	7.37	37	94	0.9	236
63	1. Hospital G.U. Santa Lucía. CARTAGENA	INTUBACIÓN OROTRAQUEAL	1		jvperpal	V	58	2016-11-02	1958-04-16	58.5484	294834	si	si	si	si	no	no	no	no	no	no	no	no	no	no	no	68	2320	68	2920	79	31	58	Difusa simétrica	Panal + retículo	Bronquiectasias	97.5	1.75	31.8367	51	43	21	73	26	7.4	34	94	0.9	177
64	1. Hospital G.U. Santa Lucía. CARTAGENA	INTUBACIÓN OROTRAQUEAL	1		jvperpal	M	63	2016-11-02	1953-06-30	63.3429	134225	si	si	si	si	no	no	no	no	no	no	no	no	no	no	no	117	2680	116	3150	84	75	89	Difusa simétrica	Vidrio deslustrado		79	1.62	30.1021	99	91	21	62	27	7.38	38	93	1	242
65	1. Hospital G.U. Santa Lucía. CARTAGENA	INTUBACIÓN OROTRAQUEAL	1		jvperpal	M	55	2016-11-02	1961-05-15	55.4689	42186	si	si	si	si	no	no	no	no	no	no	no	no	no	no	no	78	1910	95	2750	65	48	66	Difusa asimétrica	Reticular	Bronquiectasias	79	1.62	30.1021	82	69	21	82	24	7.38	37	96	1	400
66	1. Hospital G.U. Santa Lucía. CARTAGENA	INTUBACIÓN OROTRAQUEAL	1		jvperpal	M	78	2016-11-02	1938-08-18	78.2087	85565	si	si	si	si	no	no	no	no	no	no	no	no	no	no	no	90	1550	89	1880	82	32	61	Difusa asimétrica	Panal + retículo	Bronquiectasias	69	1.58	27.6398	54	33	21	62	24	7.36	33	93	0.9	692
67	2. Hospital Germans Trias i Pujol. BADALONA	INTUBACIÓN OROTRAQUEAL	1		prueba			2016-11-02	2016-11-02		12789126	si	si	si	si	no	no	no	no	no	no	no	no	no	no	no	62	169	57	213	74	65	73										130			29
68	4. Hospital Bellvitge	BRONCOSCOPIO RÍGIDO	1		ncubero	M	49	2016-11-08	1967-05-20	49.4716	10510901	si	si	si	si	no	no	no	no	no	no	no	no	no	no	no	108	2560	118	3290	78	52	56	Difusa simétrica	Vidrio deslustrado	Bronquiectasias	58	1.57	23.5304	121	133	21	77	22	7.47	30	97	1.11	605
69	4. Hospital Bellvitge	BRONCOSCOPIO RÍGIDO	1		ncubero	V	59	2016-11-08	1957-09-27	59.1155	55290	si	si	si	si	no	no	no	no	no	no	no	no	no	no	no	72	2770	82	4080	67	48	74	Difusa asimétrica + periférica	Condensación + vidrio deslustrado	Bronquiectasias	84	1.76	27.1178	79.46	98							1.1	267
70	4. Hospital Bellvitge	BRONCOSCOPIO RÍGIDO	1		ncubero	V	71	2016-11-08	1945-06-21	71.384	13794232	si	si	si	si	no	no	no	no	no	no	no	no	no	no	no	42	980	58	1770	55	45	57	Difusa asimétrica	Condensación + vidrio deslustrado	Bronquiectasias	62	1.6	24.2188	103	152	21	73	24	7.49	32	94	0.97	596
71	4. Hospital Bellvitge	BRONCOSCOPIO RÍGIDO	1		ncubero	V	70	2016-11-08	1946-06-17	70.3949	12897842	si	si	si	si	no	no	no	no	no	no	no	no	no	no	no	114	2850	106	3420	83	65	82	Localizada	Condensación + vidrio deslustrado		77	1.63	28.9811	89	74							1.11	227
72	4. Hospital Bellvitge	BRONCOSCOPIO RÍGIDO	1		ncubero	V	71	2016-11-08	1945-02-17	71.7237	13116743	si	si	si	si	no	no	no	no	no	no	no	no	no	no	no	68	1440	68	1570	92	48	92	Difusa asimétrica	Vidrio deslustrado + retículo	Granuloma	74	1.64	27.5134	74	88	21	76	24	7.446	35	95	0.92	288
73	4. Hospital Bellvitge	BRONCOSCOPIO RÍGIDO	1		ncubero	V	64	2016-11-08	1952-07-01	64.3552	13322804	si	si	si	si	no	no	no	no	no	no	no	no	no	no	no	81	2510	77	3050	82	36	59	Difusa simétrica	Vidrio deslustrado + retículo	Bronquiectasias	77	1.72	26.0276	79	74	21	92	21	7.39	35	98	0.83	182
74	4. Hospital Bellvitge	BRONCOSCOPIO RÍGIDO	1		ncubero	V	80	2016-11-08	1936-03-15	80.6503	11335305	si	si	si	si	no	no	no	no	no	no	no	no	no	no	no	62	1840	65	2610	70	85	107	Difusa asimétrica	Condensación/alveolar	Bronquiectasias	98	1.81	29.9136	95	143							1.26	202
75	4. Hospital Bellvitge	BRONCOSCOPIO RÍGIDO	1		ncubero	V	46	2016-11-08	1970-02-04	46.7593	326365	si	si	si	si	no	no	no	no	no	no	no	no	no	no	no	61	2120	82	3480	61	63	70				90	1.7	31.1419	103	159	21	39	25	7.426	39	97	1.03	355
76	4. Hospital Bellvitge	BRONCOSCOPIO RÍGIDO	1		ncubero	V	78	2016-11-08	1938-05-15	78.4853	13531348	si	si	si	si	no	no	no	no	no	no	no	no	no	no	no	76	1320	65	1590	83	35	83	Difusa simétrica	Panal + retículo	Bronquiectasias	75	1.52	32.4619	56	48								256
77	4. Hospital Bellvitge	BRONCOSCOPIO RÍGIDO	1		ncubero	V	79	2016-11-08	1937-01-21	79.7977	13080134	si	si	si	si	no	no	no	no	no	no	no	no	no	no	no	81	1540	78	1980	78	21	36	Difusa asimétrica	Vidrio deslustrado + retículo	Granuloma	67	1.55	27.8876	70	66							0.84	179
78	2. Hospital Germans Trias i Pujol. BADALONA	INTUBACIÓN OROTRAQUEAL		Falta la información de los criterios 1 y 2 de exclusión	prueba	M	78	2016-11-10	2016-11-10		12620676	si	si	si	si			no	no	no	no	no	no	no	no	si								Periférica	Vidrio deslustrado + retículo														22800
80	2. Hospital Germans Trias i Pujol. BADALONA	INTUBACIÓN OROTRAQUEAL	1		prueba	V	68	2016-11-10	1948-03-31	68.612	10683718	si	si	si	si	no	no	no	no	no	no	no	no	no	no	no	74	243	68	300	74			Difusa asimétrica + periférica	Reticular	Bronquiectasias													305
82	2. Hospital Germans Trias i Pujol. BADALONA	INTUBACIÓN OROTRAQUEAL	1		prueba	V		2016-11-11	1955-04-29	61.5374	370597	si	si	si	si	no	no	no	no	no	no	no	no	no	no	no	80	282	78	373	76	57	80	Difusa asimétrica	Vidrio deslustrado		65	1.7	22.4913	97	117							33.3	340
83	2. Hospital Germans Trias i Pujol. BADALONA	INTUBACIÓN OROTRAQUEAL	1		prueba	M	31	2016-11-11	1985-04-19	31.5648	620437	si	si	si	si	no	no	no	no	no	no	no	no	no	no	no								Difusa simétrica														33.1	357
84	2. Hospital Germans Trias i Pujol. BADALONA	INTUBACIÓN OROTRAQUEAL	1		prueba	M	75	2016-11-14	1940-11-27	75.9645	587058	si	si	si	si	no	no	no	no	no	no	no	no	no	no	no	79	1751	68	2070	86	31	61	Difusa asimétrica	Vidrio deslustrado + retículo		76	1.64	28.257	65	75								198
85	2. Hospital Germans Trias i Pujol. BADALONA	INTUBACIÓN OROTRAQUEAL		Incumple el criterio 1 de exclusión	prueba	M	45	2016-11-14	2016-11-14		304523	si	si	si	si	si	no	no	no	no	no	no	no	no	no	si	37	990	49	1630	61	68	111	Difusa simétrica			60	1.57	24.3418	83	121								235
86	2. Hospital Germans Trias i Pujol. BADALONA	INTUBACIÓN OROTRAQUEAL	1		prueba	V	62	2016-11-14	2016-11-14			si	si	si	si	no	no	no	no	no	no	no	no	no	no	no	69	2240	60	2660	84	53	80		Vidrio deslustrado + retículo	Bronquiectasias				58	33								198
89	2. Hospital Germans Trias i Pujol. BADALONA	INTUBACIÓN OROTRAQUEAL	1		prueba	V	68	2016-11-15	1948-09-03	68.1995	262122	si	si	si	si	no	no	no	no	no	no	no	no	no	no	no	59	1760	50	2050	86	43	95	Difusa asimétrica	Panal		73	1.65	26.8136	61	66							32.7	177
90	2. Hospital Germans Trias i Pujol. BADALONA	INTUBACIÓN OROTRAQUEAL	1		fandreo	M	44	2016-11-15	1972-08-05	44.2787	493583	si	si	si	si	no	no	no	no	no	no	no	no	no	no	no	58	161	53	182	88	28	54	Difusa asimétrica	Vidrio deslustrado		73	1.58	29.2421	55	63							36.6	230
91	2. Hospital Germans Trias i Pujol. BADALONA	INTUBACIÓN OROTRAQUEAL	1		fandreo		68	2016-11-15	1948-09-03	68.1995	262122	si	si	si	si	no	no	no	no	no	no	no	no	no	no	no	59	1760	50	2050	86	43	95	Difusa asimétrica + periférica	Vidrio deslustrado + retículo		73	1.65	26.8136	61	66							32.7	177
92	2. Hospital Germans Trias i Pujol. BADALONA	INTUBACIÓN OROTRAQUEAL	1		fandreo	M	77	2016-11-15	1938-12-10	77.9319	15871862	si	si	si	si	no	no	no	no	no	no	no	no	no	no	no	102	182	79	206	88	58.7	75.8	Periférica	Reticular													32.8	185
93	8. Hospital Universitario de SALAMANCA	MASCARILLA LARÍNGEA	1		rcordovill	M	57	2016-11-17	2016-11-17		113613	si	si	si	si	no	no	no	no	no	no	no	no	no	no	no	63	1750	62	2160	80	62	112	Difusa asimétrica + periférica	Condensación/alveolar	Bronquiectasias	77	1.68	27.2817	60	66	21					96	34	23700
94	8. Hospital Universitario de SALAMANCA	MASCARILLA LARÍNGEA	1		rcordovill	V	65	2016-11-17	2016-11-17		41952	si	si	si	si	no	no	no	no	no	no	no	no	no	no	no	94	2410	91	3010	80	36	55	Difusa asimétrica	Reticular		100	1.68	35.4308	70	50.6	21					93		23500
95	8. Hospital Universitario de SALAMANCA	MASCARILLA LARÍNGEA	1		rcordovill	M	50	2016-11-17	2016-11-17		3009279	si	si	si	si	no	no	no	no	no	no	no	no	no	no	no	67	1890	59	2100	90			Difusa asimétrica	Vidrio deslustrado + retículo		78	1.64	29.0006	50	28	21	75	24	7.43	36	97		30600
96	8. Hospital Universitario de SALAMANCA	MASCARILLA LARÍNGEA	1		rcordovill	V	60	2016-11-17	2016-11-17		1712229	si	si	si	si	no	no	no	no	no	no	no	no	no	no	no	71	2601	64	3060	85	28	61	Difusa asimétrica + central	Vidrio deslustrado		100	1.8	30.8642	65	64	21	48	22.4	7.44	33	85.2	37	34900
97	8. Hospital Universitario de SALAMANCA	MASCARILLA LARÍNGEA	1		rcordovill	M	30	2016-11-17	2016-11-17		4382467	si	si	si	si	no	no	no	no	no	no	no	no	no	no	no						71		Localizada	Vidrio deslustrado + retículo												99	28	47300
98	7. Hospital Fundación Jimenez Díaz. MADRID	BRONCOSCOPIO RÍGIDO	1		mteresa	V	62	2016-11-17	2016-11-17		1349414	si	si	si	si	no	no	no	no	no	no	no	no	no	no	no	84	2930	80	3580	82	111	104	Difusa asimétrica	Condensación + vidrio deslustrado		105	1.79	32.7705	86	96	21					97	34	161
99	2. Hospital Germans Trias i Pujol. BADALONA	INTUBACIÓN OROTRAQUEAL	1		fandreo	V	79	2016-11-18	1937-05-22	79.4935	603153	si	si	si	si	no	no	no	no	no	no	no	no	no	no	no	42	151	47	237	90	71	176	Difusa asimétrica	Condensación/alveolar	Bronquiectasias	77	1.8	23.7654				89			36		35	394
100	2. Hospital Germans Trias i Pujol. BADALONA	INTUBACIÓN OROTRAQUEAL	1		fandreo	M	89	2016-11-20	1927-09-10	89.1948	330000	si	si	si	si	no	no	no	no	no	no	no	no	no	no	no	63	88	65	138	64	51	91	Localizada	Condensación/alveolar	Bronquiectasias	62	1.48	28.3053	82	106		60			40		29	88
101	2. Hospital Germans Trias i Pujol. BADALONA	INTUBACIÓN OROTRAQUEAL		Incumple el criterio 1 de exclusión y no tiene diagnóstico histopatológico con la técnica convencional ni con criobiosonda	fandreo		71	2016-11-20	1944-12-17	71.9262	344756	si	si	si	si	si	no	no	no	no	no	no	no	no	no	si
102	2. Hospital Germans Trias i Pujol. BADALONA	INTUBACIÓN OROTRAQUEAL	1		fandreo	V	65	2016-11-20	1951-07-06	65.3757	15043004	si	si	si	si	no	no	no	no	no	no	no	no	no	no	no	65	232	58	279	113	58	112	Difusa simétrica	Vidrio deslustrado	Bronquiectasias	74	1.74	24.4418	61	53							25.7	274
103	2. Hospital Germans Trias i Pujol. BADALONA	INTUBACIÓN OROTRAQUEAL	1		fandreo	M	83	2016-11-21	1933-10-15	83.1017	411270	si	si	si	si	no	no	no	no	no	no	no	no	no	no	no	110	138	99	185	107	56	89	Difusa asimétrica + periférica	Panal + retículo	Bronquiectasias	62	1.41	31.1856									31.1	191
104	2. Hospital Germans Trias i Pujol. BADALONA	INTUBACIÓN OROTRAQUEAL	1		fandreo	V	73	2016-11-21	1943-06-15	73.4359	73950	si	si	si	si	no	no	no	no	no	no	no	no	no	no	no	60	184	64	268	95	52	99	Difusa asimétrica + periférica	Vidrio deslustrado	Granuloma	74	1.67	26.5338	73	93							30.9	162
105	2. Hospital Germans Trias i Pujol. BADALONA	INTUBACIÓN OROTRAQUEAL	1		fandreo	V	94	2016-11-21	2022-08-23		271530	si	si	si	si	no	no	no	no	no	no	no	no	no	no	no								Difusa simétrica	Reticular	Adenopatías calcificadas												30.1	138
106	7. Hospital Fundación Jimenez Díaz. MADRID	BRONCOSCOPIO RÍGIDO	1		mteresa	V		2016-11-21	2016-11-21		538796	si	si	si	si	no	no	no	no	no	no	no	no	no	no	no	104	2720	97	3400	80	67	75	Difusa asimétrica + periférica	Reticular		74.5	1.72	25.1825								98	29.4	243
107	7. Hospital Fundación Jimenez Díaz. MADRID	BRONCOSCOPIO RÍGIDO	1		mteresa	M		2016-11-21	2016-11-21		919212	si	si	si	si	no	no	no	no	no	no	no	no	no	no	no	74	1380	71	1620	85	53	73	Difusa asimétrica	Vidrio deslustrado + retículo		76	1.6	29.6875	57	32						99	30	209
108	7. Hospital Fundación Jimenez Díaz. MADRID	BRONCOSCOPIO RÍGIDO	1		mteresa	V	70	2016-11-21	2016-11-21		1383292	si	si	si	si	no	no	no	no	no	no	no	no	no	no	no	99	2830	89	3320	85	81	87	Difusa asimétrica + periférica	Vidrio deslustrado + retículo		120	1.72	40.5625	71	42						98	22	215
110	3. Hospital Universitario la Fe. VALENCIA	MASCARILLA LARÍNGEA	1		rasmartine	M	70	2017-06-07	1946-07-07	70.9178	6510784	si	si	si	si	no	no	no	no	no	no	no	no	no	no	no	104	1750	96	1980	88	62	84	Difusa asimétrica	Vidrio deslustrado + retículo	Bronquiectasias	54	1.51	23.6832			21					98		317
112	7. Hospital Fundación Jimenez Díaz. MADRID	BRONCOSCOPIO RÍGIDO	1		mteresa	V	78	2017-06-26	2017-06-26		1005960	si	si	si	si	no	no	no	no	no	no	no	no	no	no	no	66	1450	58	1690	85	61	76	Periférica	Panal + retículo		66.4	1.61	25.6163									33.9	18500
113	2. Hospital Germans Trias i Pujol. BADALONA	INTUBACIÓN OROTRAQUEAL	1		prueba	V	67	2017-06-27	1950-05-29	67.0795	15877415	si	si	si	si	no	no	no	no	no	no	no	no	no	no	no	48	1490	44	1810	82	54	134	Difusa asimétrica	Vidrio deslustrado + retículo		95	1.65	34.8944	54	67								175
114	2. Hospital Germans Trias i Pujol. BADALONA	INTUBACIÓN OROTRAQUEAL	1		prueba	V	43	2017-06-27	1974-04-30	43.1589		si	si	si	si	no	no	no	no	no	no	no	no	no	no	no	84	3560	84	4490	79	68	84	Difusa simétrica	Vidrio deslustrado		71	1.77	22.6627	109	173
115	2. Hospital Germans Trias i Pujol. BADALONA	INTUBACIÓN OROTRAQUEAL	1		prueba		76	2017-06-28	1940-11-08	76.6352	13825372	si	si	si	si	no	no	no	no	no	no	no	no	no	no	no	76	2470	70	3120	79	61	61	Difusa asimétrica + periférica	Vidrio deslustrado + retículo	Bronquiectasias	72	1.72	24.3375	70	74								183
117	9. Hospital Clinico universitario de Valladolid	INTUBACIÓN OROTRAQUEAL	1		cdisdier	M	72	2017-06-28	1945-01-17	72.4438	231170	si	si	si	si	no	no	no	no	no	no	no	no	no	no	no	109	1810	106	2140	84	66	84	Difusa simétrica	Reticular	Bronquiectasias	75	1.56	30.8185	86	85
118	9. Hospital Clinico universitario de Valladolid	INTUBACIÓN OROTRAQUEAL	1		cdisdier	V	72	2017-06-28	1944-11-18	72.6079	494681	si	si	si	si	no	no	no	no	no	no	no	no	no	no	no	79	2070	88	2990	69	110	106	Difusa asimétrica	Panal + retículo	Bronquiectasias	92	1.65	33.7925
119	9. Hospital Clinico universitario de Valladolid	INTUBACIÓN OROTRAQUEAL	1		cdisdier	V	67	2017-06-28	1949-11-29	67.5781	60519	si	si	si	si	no	no	no	no	no	no	no	no	no	no	no	70	2150	75	2959	73	41	63	Localizada	Reticular		94	1.74	31.0477	69	71	21	59	25	7.41	40	89	41	18900
121	3. Hospital Universitario la Fe. VALENCIA	MASCARILLA LARÍNGEA		Incumple el criterio 2 de exclusión	rasmartine	M	74	2017-07-01	1942-10-29	74.6712	6306561	si	si	si	si	no	si	no	no	no	no	no	no	no	no	si	107	1490	102	1780	84	54	72	Localizada	Condensación + vidrio deslustrado		45	1.46	21.1109			24	68	25.5	7.46	34.6	94		223
122	3. Hospital Universitario la Fe. VALENCIA	MASCARILLA LARÍNGEA	1		rasmartine	V	77	2017-07-01	1939-11-18	77.6164	2805979	si	si	si	si	no	no	no	no	no	no	no	no	no	no	no	71	1770	84	2730	65	51	70.5	Difusa asimétrica	Panal + retículo	Bronquiectasias	80	1.75	26.1224	84	73	21	74	24.9	7.44	36	94		229
123	3. Hospital Universitario la Fe. VALENCIA	MASCARILLA LARÍNGEA	1		rasmartine	V	71	2017-07-02	1946-04-14	71.2164	6525669	si	si	si	si	no	no	no	no	no	no	no	no	no	no	no	74	2460	65	2980	83	56	60	Periférica	Panal + retículo	Bronquiectasias	74			67									200
124	3. Hospital Universitario la Fe. VALENCIA	MASCARILLA LARÍNGEA	1		rasmartine	V		2017-07-10	1942-08-22	74.8822	1087962	si	si	si	si	no	no	no	no	no	no	no	no	no	no	no	74	1950	104	3580	54			Localizada	Reticular	Adenopatías calcificadas	70	1.69	24.5089			21					99		243
125	3. Hospital Universitario la Fe. VALENCIA	MASCARILLA LARÍNGEA	1		rasmartine	V	79	2017-07-10	1938-01-26	79.4521	1625485	si	si	si	si	no	no	no	no	no	no	no	no	no	no	no	106	2280	92	2620	87	55	80	Difusa simétrica	Panal + retículo	Bronquiectasias	68	1.6	26.5625			21					97		461
126	3. Hospital Universitario la Fe. VALENCIA	MASCARILLA LARÍNGEA	1		rasmartine	V	55	2017-07-11	1962-04-02	55.274	6546523	si	si	si	si	no	no	no	no	no	no	no	no	no	no	no	49	1970	45	2300	86	25	81	Difusa asimétrica + periférica	Vidrio deslustrado + retículo	Bronquiectasias	104	1.87	29.7406	34	28	21					96		278
127	3. Hospital Universitario la Fe. VALENCIA	MASCARILLA LARÍNGEA	1		rasmartine	V	73	2017-07-11	1944-03-18	73.3129	6548318	si	si	si	si	no	no	no	no	no	no	no	no	no	no	no	75	1730	73	2220	79	30	59	Difusa simétrica	Vidrio deslustrado + retículo	Bronquiectasias	70	1.59	27.6888	57	35	21	72		7.42	39.3			325
128	3. Hospital Universitario la Fe. VALENCIA	MASCARILLA LARÍNGEA	1		rasmartine	M	68	2017-07-11	1949-06-13	68.0767	3181944	si	si	si	si	no	no	no	no	no	no	no	no	no	no	no	103	2080	113	2730	76	58	71	Localizada	Vidrio deslustrado + retículo		82	1.58	32.8473			21					97		222
129	3. Hospital Universitario la Fe. VALENCIA	MASCARILLA LARÍNGEA	1		rasmartine	V	62	2017-07-12	1954-08-28	62.8712	1354815	si	si	si	si	no	no	no	no	no	no	no	no	no	no	no	88	2750	106	4190	66	75	75	Periférica	Reticular		84	1.72	28.3937	104	103	21					98		318
130	3. Hospital Universitario la Fe. VALENCIA	MASCARILLA LARÍNGEA	1		rasmartine	M	55	2017-07-12	1962-06-04	55.1041	1691269	si	si	si	si	no	no	no	no	no	no	no	no	no	no	no	64	1580	65	1890	84	59	107	Difusa asimétrica	Condensación/alveolar		81	1.62	30.8642	63	60	21					97		179
131	3. Hospital Universitario la Fe. VALENCIA	MASCARILLA LARÍNGEA	1		rasmartine	V	64	2017-07-12	1953-04-22	64.2219	6602114	si	si	si	si	no	no	no	no	no	no	no	no	no	no	no			83			45	69	Localizada	Panal + retículo							21					98		215
132	3. Hospital Universitario la Fe. VALENCIA	MASCARILLA LARÍNGEA	1		rasmartine	V	72	2017-07-12	1945-04-11	72.2521	4908914	si	si	si	si	no	no	no	no	no	no	no	no	no	no	no	104	2960	94	3490	85	61	85	Difusa asimétrica + periférica	Panal + retículo		86	1.71	29.4108			21					98		170
133	6. Hospital de la Santa Creu i Sant Pau	INTUBACIÓN OROTRAQUEAL	1		vpajares	M	70	2017-11-08	2017-11-08		1594427	si	si	si	si	no	no	no	no	no	no	no	no	no	no	no	102	186	107	269	69	66	74	Difusa asimétrica	Vidrio deslustrado + retículo		64	1.5	28.4444	105	87	21	77	30	7.48	40	95	0.86	267
135	6. Hospital de la Santa Creu i Sant Pau	INTUBACIÓN OROTRAQUEAL	1		vpajares	M	64	2017-11-08	2017-11-08		1033368	si	si	si	si	no	no	no	no	no	no	no	no	no	no	no	60	128	63	179	71	67	81	Difusa asimétrica	Reticular		54	1.55	22.4766	61	50	21	69	25	7.4	39			267
136	6. Hospital de la Santa Creu i Sant Pau	INTUBACIÓN OROTRAQUEAL	1		vpajares	V	70	2017-11-08	2017-11-08		1639254	si	si	si	si	no	no	no	no	no	no	no	no	no	no	no	84	287	70	326	88	69	111	Difusa asimétrica	Reticular	Bronquiectasias	99	1.73	33.0783	76	73	21	85	25	7.44	36	96	0.88	167
137	6. Hospital de la Santa Creu i Sant Pau	INTUBACIÓN OROTRAQUEAL	1		vpajares			2017-11-09	2017-11-09		1646883	si	si	si	si	no	no	no	no	no	no	no	no	no	no	no								Difusa simétrica	Vidrio deslustrado + retículo	Bronquiectasias
138	6. Hospital de la Santa Creu i Sant Pau	INTUBACIÓN OROTRAQUEAL	1		super	M	61	2017-11-17	2017-11-17		1232962	si	si	si	si	no	no	no	no	no	no	no	no	no	no	no	59	58	156	190	82	73	87	Difusa asimétrica	Vidrio deslustrado + retículo		64	1.55	26.6389	67	71						97
139	6. Hospital de la Santa Creu i Sant Pau	INTUBACIÓN OROTRAQUEAL	1		super	V	36	2017-11-17	2017-11-17		872084	si	si	si	si	no	no	no	no	no	no	no	no	no	no	no	81	364	88	492	74	89	102				102	1.8	31.4815	92	92						99	1.1	237
140	6. Hospital de la Santa Creu i Sant Pau	INTUBACIÓN OROTRAQUEAL	1		super	V	38	2017-11-17	2017-11-17		1631700	si	si	si	si	no	no	no	no	no	no	no	no	no	no	no	81	337	84	433	77	67	80	Difusa asimétrica	Vidrio deslustrado		61	1.74	20.148	100	130						99	0.92	215
141	6. Hospital de la Santa Creu i Sant Pau	INTUBACIÓN OROTRAQUEAL	1		super	M	49	2017-11-17	2017-11-17		1633646	si	si	si	si	no	no	no	no	no	no	no	no	no	no	no	93	236	101	326	72	77	83	Difusa asimétrica + central	Condensación/alveolar	Adenopatías calcificadas	53	1.56	21.7784	118	127						97		277
142	6. Hospital de la Santa Creu i Sant Pau	INTUBACIÓN OROTRAQUEAL	1		super	V	65	2017-11-17	2017-11-17			si	si	si	si	no	no	no	no	no	no	no	no	no	no	no	52	153	55	227	67	66	112	Difusa asimétrica	Vidrio deslustrado + retículo		79	1.67	28.3266	64	65						97	0.88	172
501	10. H.universitario Álvaro Cunqueiro (H.Vigo)	INTUBACIÓN OROTRAQUEAL	1																								63.9	2250	62.8	2920	77	52	62							79.4	93						94	33.1	157
502	10. H.universitario Álvaro Cunqueiro (H.Vigo)	INTUBACIÓN OROTRAQUEAL		No tiene diagnóstico histopatológico con la técnica convencional																							72	2390	63.3	2860	83	52	52														93	38	152
503	10. H.universitario Álvaro Cunqueiro (H.Vigo)	INTUBACIÓN OROTRAQUEAL	1																								65	2080	60	2550	81	54	68														98	41	318
504	10. H.universitario Álvaro Cunqueiro (H.Vigo)	INTUBACIÓN OROTRAQUEAL	1																								78	2440	78	2370	73	61	66														97	31.4	215
505	10. H.universitario Álvaro Cunqueiro (H.Vigo)	INTUBACIÓN OROTRAQUEAL	1																								82	2670	70	3130	74	50	64							74	64						95	30	205
506	10. H.universitario Álvaro Cunqueiro (H.Vigo)	INTUBACIÓN OROTRAQUEAL	1																								99	2700	88	3410	79	42	42														97	31.6	175
507	10. H.universitario Álvaro Cunqueiro (H.Vigo)	INTUBACIÓN OROTRAQUEAL	1																								66	2160	67	2950	75	81	81							88	89						95	28.3	229
508	10. H.universitario Álvaro Cunqueiro (H.Vigo)	INTUBACIÓN OROTRAQUEAL	1																								75	2910	72	3680	79	53	67							73	65						98	46	239
509	10. H.universitario Álvaro Cunqueiro (H.Vigo)	INTUBACIÓN OROTRAQUEAL	1																								72	1370	72	1930	70	63	66							93	101						99	37	233
510	10. H.universitario Álvaro Cunqueiro (H.Vigo)	INTUBACIÓN OROTRAQUEAL	1																								69	2090	57	2410	87	45	72							56	42						97	28.7	201
511	10. H.universitario Álvaro Cunqueiro (H.Vigo)	INTUBACIÓN OROTRAQUEAL	1																																												94		158
512	10. H.universitario Álvaro Cunqueiro (H.Vigo)	INTUBACIÓN OROTRAQUEAL	1																								115	2500	106	3170	78	92	89															31.2	269
513	10. H.universitario Álvaro Cunqueiro (H.Vigo)	INTUBACIÓN OROTRAQUEAL	1																								86	1930	78	2310	83	60	65														100	37	185
514	10. H.universitario Álvaro Cunqueiro (H.Vigo)	INTUBACIÓN OROTRAQUEAL	1																								71	2530	65	2530	80	54	73							70	107						90	28.3	472
515	10. H.universitario Álvaro Cunqueiro (H.Vigo)	INTUBACIÓN OROTRAQUEAL	1																								71	3550	82	3550	71	63	70							81	69						98	27.8	211
516	10. H.universitario Álvaro Cunqueiro (H.Vigo)	INTUBACIÓN OROTRAQUEAL	1																								90	2500	80	3160	79	63	63							80	61						96	35.5	228
517	10. H.universitario Álvaro Cunqueiro (H.Vigo)	INTUBACIÓN OROTRAQUEAL	1																								73.7	1490	65.6	1780	83	32.4	45.7							71	69						93	36	190
518	10. H.universitario Álvaro Cunqueiro (H.Vigo)	INTUBACIÓN OROTRAQUEAL	1																								71	1200	54	1310	92	43	43							88	114						98	33.8	268
519	10. H.universitario Álvaro Cunqueiro (H.Vigo)	INTUBACIÓN OROTRAQUEAL	1																								66	2170	62	2800	77	54	54														96	33	215
520	10. H.universitario Álvaro Cunqueiro (H.Vigo)	INTUBACIÓN OROTRAQUEAL	1																								84	2070	68.7	3080	89	50	70							68	50						98	30.9	147
521	10. H.universitario Álvaro Cunqueiro (H.Vigo)	INTUBACIÓN OROTRAQUEAL	1																																												94	26.9	178
522	10. H.universitario Álvaro Cunqueiro (H.Vigo)	INTUBACIÓN OROTRAQUEAL	1																																												96	29.4	216
523	10. H.universitario Álvaro Cunqueiro (H.Vigo)	INTUBACIÓN OROTRAQUEAL	1																								82	2360	81	2930	81	83	81														95	41	307
524	10. H.universitario Álvaro Cunqueiro (H.Vigo)	INTUBACIÓN OROTRAQUEAL	1																								85	2310	70	2650	87	44	62							67.8	45						94	37	192
525	10. H.universitario Álvaro Cunqueiro (H.Vigo)	INTUBACIÓN OROTRAQUEAL	1																								98	2200	92	2760	79	56	56														99	31	337
526	10. H.universitario Álvaro Cunqueiro (H.Vigo)	INTUBACIÓN OROTRAQUEAL	1																								104	4420	114	6310	70	73	55														98	31.8	181
527	10. H.universitario Álvaro Cunqueiro (H.Vigo)	INTUBACIÓN OROTRAQUEAL	1																								76.9	2340	68.9	2080	77	54.9	76.2														99	35	258
528	10. H.universitario Álvaro Cunqueiro (H.Vigo)	INTUBACIÓN OROTRAQUEAL	1																								56	2520	50	2520	76	57	76							58	60						94	35	231
529	10. H.universitario Álvaro Cunqueiro (H.Vigo)	INTUBACIÓN OROTRAQUEAL	1																								87	2250	87	2770	81	58	62														99	33.1	203
530	10. H.universitario Álvaro Cunqueiro (H.Vigo)	INTUBACIÓN OROTRAQUEAL	1																								94	3110	81	3740	83	72	73														98	38	201
531	10. H.universitario Álvaro Cunqueiro (H.Vigo)	INTUBACIÓN OROTRAQUEAL	1																								72	2300	70	3070	75	51	64							91	93						95	26.3	152
532	10. H.universitario Álvaro Cunqueiro (H.Vigo)	INTUBACIÓN OROTRAQUEAL	1																								112	3230	98	3650	88	85	97														98	32.1	219
[truncated: 80 more columns]
